# Supplementary material
Source: publisher figshare collection journal article supplement (https://gsapubs.figshare.com/articles/dataset/_/20425563)
Supplement: Supplementary file 1 [file 1]

Wang, R., Xu, Z., and Santosh, M., 2022, Mid–late Neoproterozoic tectonic evolution of the northern margin of the Yangtze Block, South China, as constrained from the detrital zircon record: GSA Bulletin, <https://doi.org/10.1130/B36419.1>.

## Supplemental Material

**Table S1.** Zircon U-Pb isotopic dating data.

**Table S2.** Zircon Lu-Hf isotopic data.

**Table S3.** Zircon trace (ppm) element compositions.
